# Supplementary material for: Microwave-assisted preparation of self-doped TiO2 nanotube arrays for enhanced photoelectrochemical water splitting
Source: Royal Society of Chemistry journal article supplement (doi:10.1039/c4ta05021e), 2014-11-05
Supplement: c4ta05021e1.pdf [file c4ta05021e1.pdf]

## Supporting Information

### Microwave-Assisted preparation of self-doped TiO<sub>2</sub> nanotube arrays for enhanced photoelectrochemical water splitting

Hui Li, Jiangqiong Chen, Zhengbin Xia\*, Junheng Xing

School of Chemistry and Chemical Engineering, South China University of Technology, Guangzhou, Guangdong 510641, China

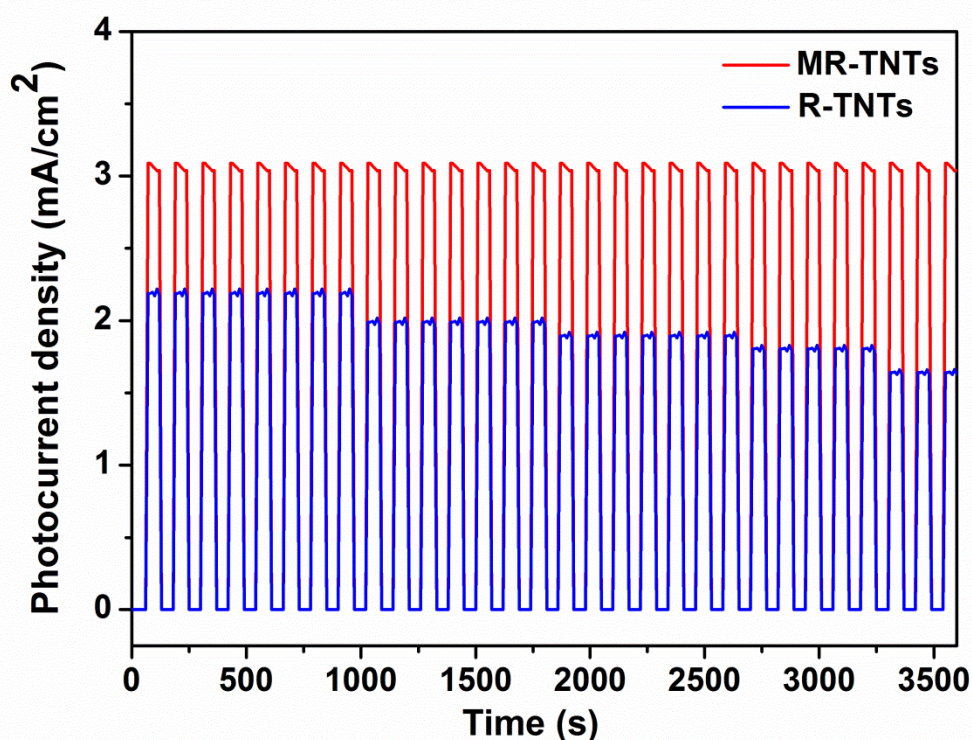

**Figure S1.** Photocurrent density response stability of the R-TNTs and MR-TNTs photoelectrodes under simulated solar illumination (AM1.5, 100 mW/cm<sup>2</sup>).

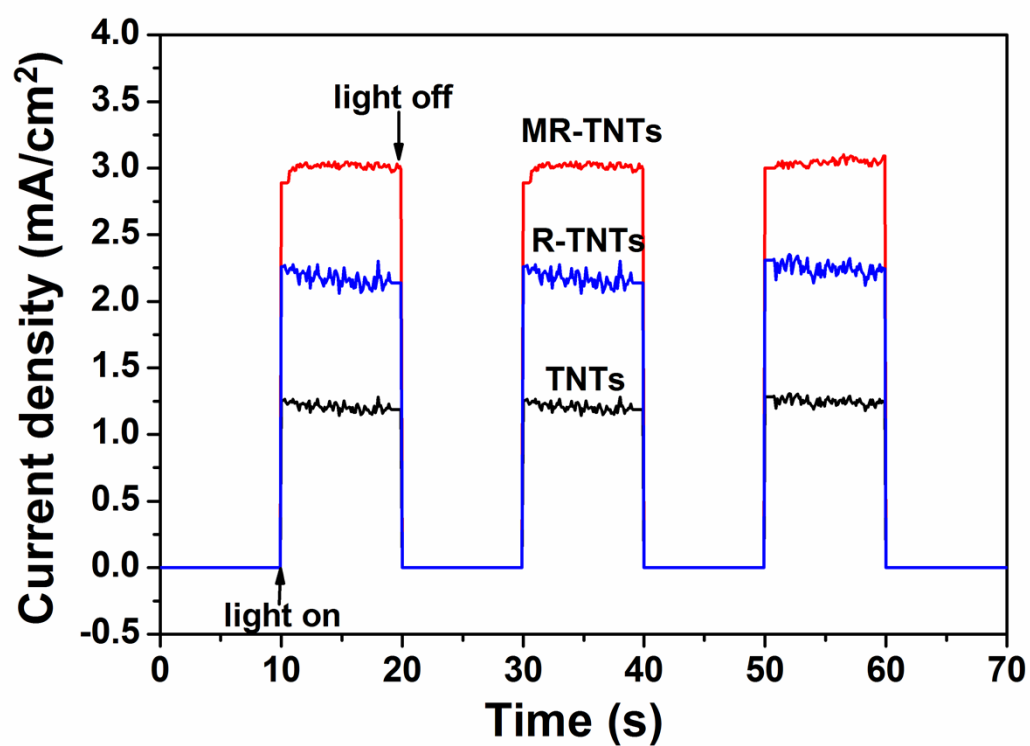

**Figure S2.** Photocurrent density response of the pristine TNTs, R-TNTs and MR-TNTs under simulated solar illumination (AM1.5, 100 mW/cm<sup>2</sup>).
